# Supplementary material
Source: Springer Nature journal article supplement (https://www.springermedizin.de/resource/supplementary/12955_2012_955_MOESM1_ESM.pdf/9558758)

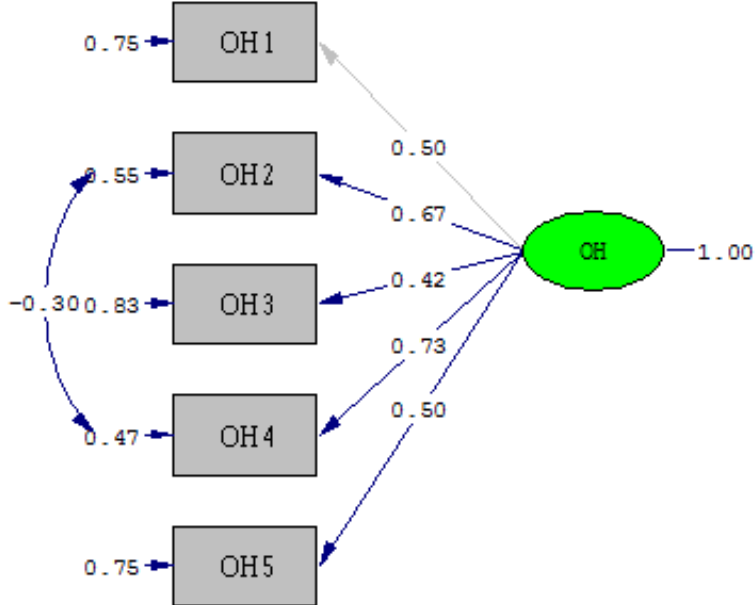

Chi-Square=2.17, df=4, P-value=0.70385, RMSEA=0.000

Supplement: MOESM1 [file 9558758]
